# Supplementary material for: Mapping the Temporal Landscape of Breast Cancer Using Epigenetic Entropy
Source: PubMed Central journal article supplement (PMC11581123; doi:10.21203/rs.3.rs-5119308/v1), 2024-10-28
Supplement: NIHPPRS5119308V1-supplement-1.pdf [file NIHPPRS5119308V1-supplement-1.pdf]

## Supplementary Files

This is a list of supplementary files associated with this preprint. Click to download.

- [MolClockSupplimentaryv3.docx](#)
- [SupplementaryMethodsv3.pdf](#)
